# Supplementary material for: The Perturbation of Pulmonary Surfactant by Bacterial Lipopolysaccharide and Its Reversal by Polymyxin B: Function and Structure
Source: MDPI journal article supplement (doi:10.3390/ijms19071964), 2018-07-05
Supplement: s1 [file s1]

Supplementary material

**The perturbation of pulmonary surfactant by bacterial lipopolysaccharide and its reversal by polymyxin B: function and structure**

Kolomaznik Maros<sup>a,b</sup>, Liskayova Gilda<sup>c</sup>, Kanjakova Nina<sup>c</sup>, Hubcik Lukas<sup>c</sup>, Uhrikova Daniela<sup>\*c</sup>, Calkovska Andrea<sup>a,b</sup>

<sup>a</sup>Martin Biomedical Center and <sup>b</sup>Department of Physiology, Jessenius Faculty of Medicine in Martin; Comenius University in Bratislava, Slovakia; <sup>c</sup>Department of Physical Chemistry of Drugs, Faculty of Pharmacy, Comenius University in Bratislava, Slovakia

postal address of affiliation

<sup>a,b</sup>Department of Physiology and BioMed, Jessenius Faculty of Medicine, Comenius University, Mala Hora 4C, SK-036 01 Martin, Slovakia

<sup>c</sup>Department of Physical Chemistry of Drugs, Faculty of Pharmacy, Comenius University, Odbojarov 10, SK-832 32 Bratislava 3, Slovakia

e-mail addresses

Kolomaznik Maros - maros.kolomaznik@uniba.sk

Liskayova Gilda - liskayova@fpharm.uniba.sk

Kanjakova Nina– kanjakova2@uniba.sk

Hubcik Lukas - hubcik@fpharm.uniba.sk

Uhrikova Daniela - daniela.uhrikova@fpharm.uniba.sk

Calkovska Andrea - andrea.calkovska@jfmed.uniba.sk

Corresponding author

\*Daniela Uhrikova, prof.

Department of Physical Chemistry of Drugs

Faculty of Pharmacy

Comenius University

Odbojarov 10

SK-832 32 Bratislava 3

Slovakia

daniela.uhrikova@fpharm.uniba.sk

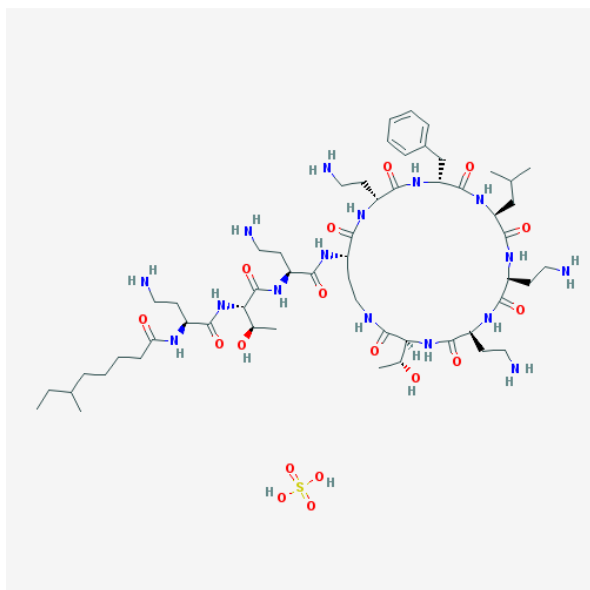

**Figure S1.** Structure of polymyxin B (PxB).

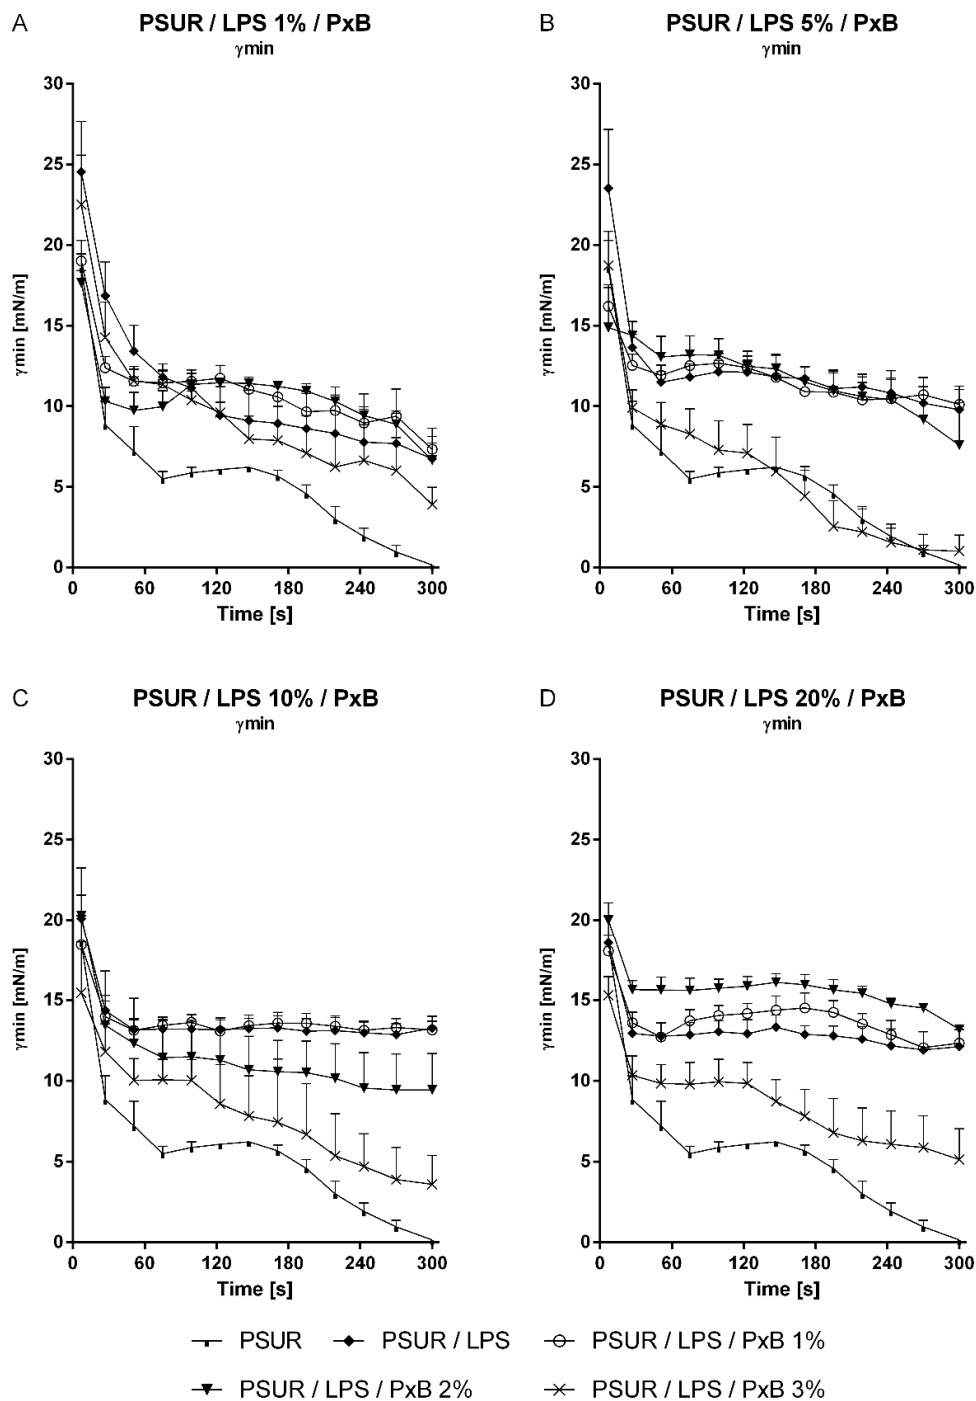

**Figure S2.** Minimum surface tension ( $\gamma_{min}$ ) of modified porcine surfactant (PSUR) at phospholipid concentration 1.75 mg/ml with lipopolysaccharide (LPS) 1 % and polymyxin B (PxB) 1, 2, 3 % (A), LPS 5 % and PxB 1, 2, 3 % (B), LPS 10 % and PxB 1, 2, 3 % (C) and LPS 20 % and PxB 1, 2, 3 % (D) during the whole period of pulsation 5 minutes. Values are given as mean $\pm$ SEM.

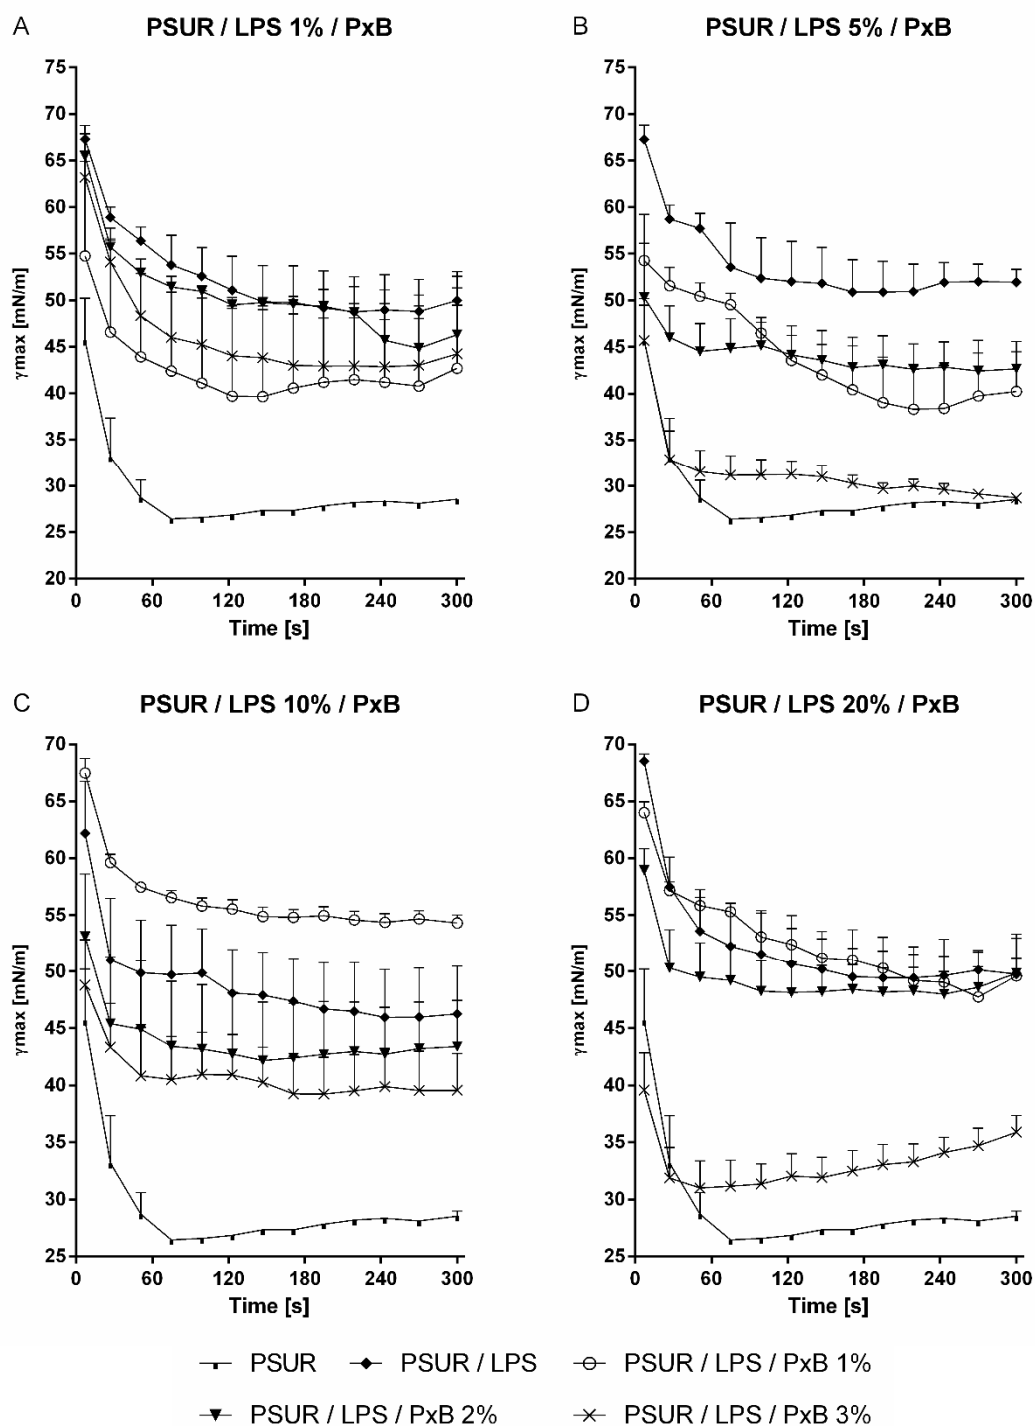

**Figure S3.** Maximum surface tension ( $\gamma_{max}$ ) of modified porcine surfactant (PSUR) at phospholipid concentration 1.75 mg/ml with lipopolysaccharide (LPS) 1 % and polymyxin B (PxB) 1, 2, 3 % (A), LPS 5 % and PxB 1, 2, 3 % (B), LPS 10 % and PxB 1, 2, 3 % (C) and LPS 20 % and PxB 1, 2, 3 % (D) during the whole period of pulsation 5 minutes. Values are given as mean $\pm$ SEM.

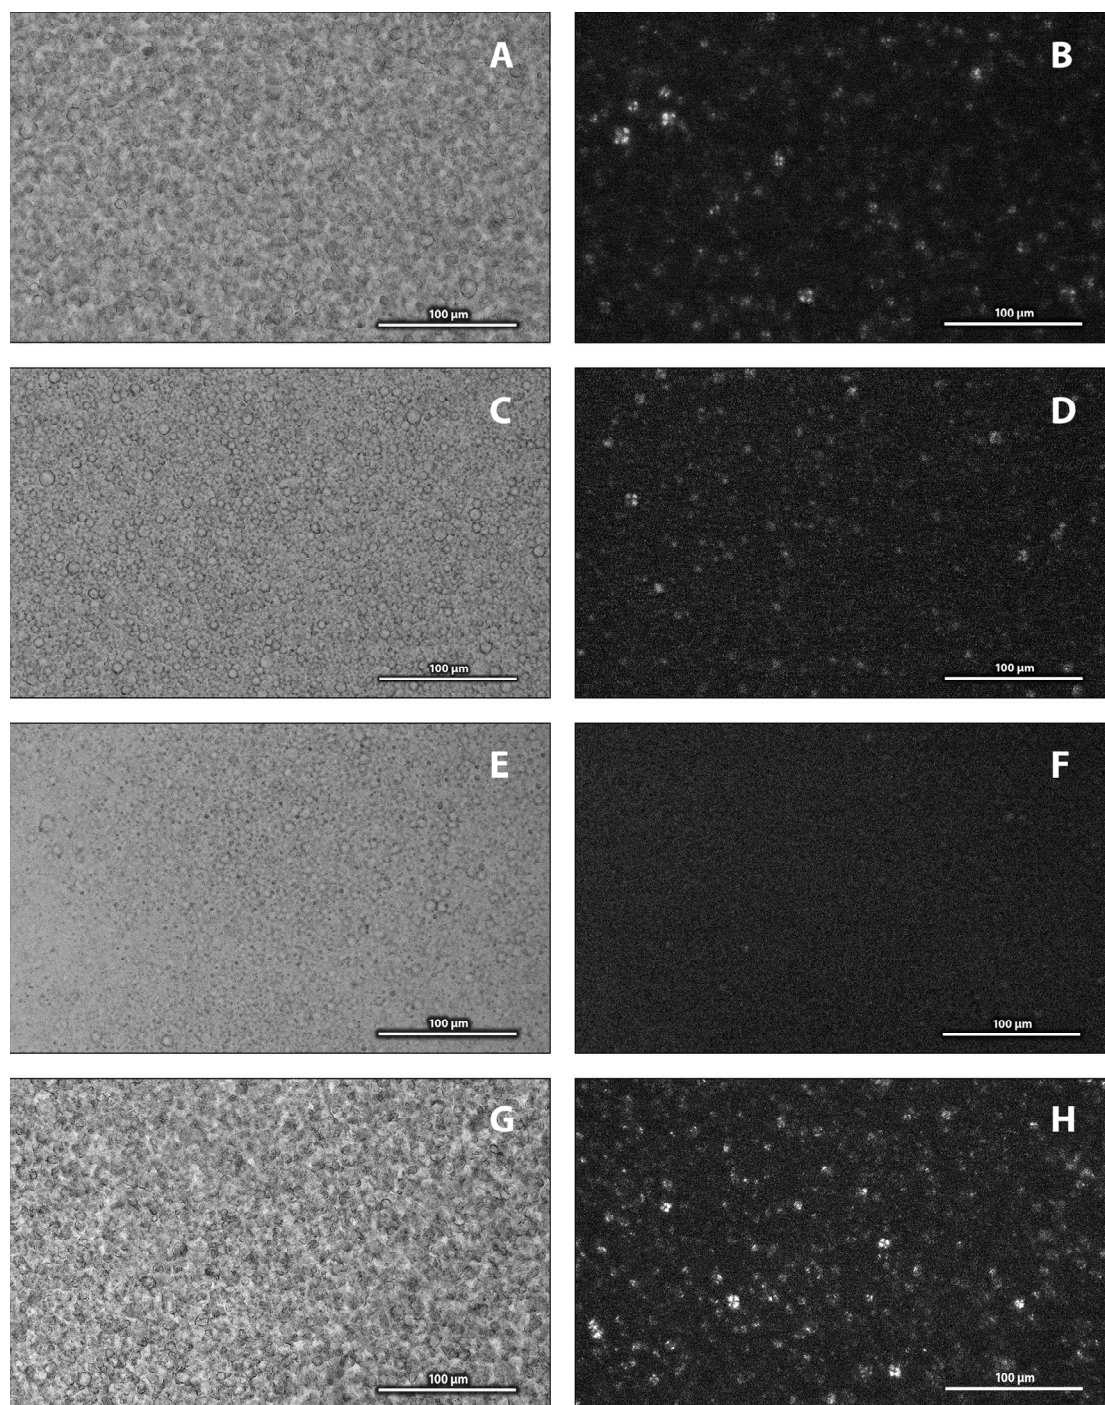

**Figure S4.** Microscopy photos recorded in normal and polarized light for aqueous dispersion of modified porcine surfactant (PSUR) (A and B); PSUR and 10 % LPS incubated for 30 min at 37 °C (C and D); PSUR and 10 % LPS incubated for 2 hours at 37 °C (E and F); PSUR/ 10 % LPS and 3 % PxB (G and H).

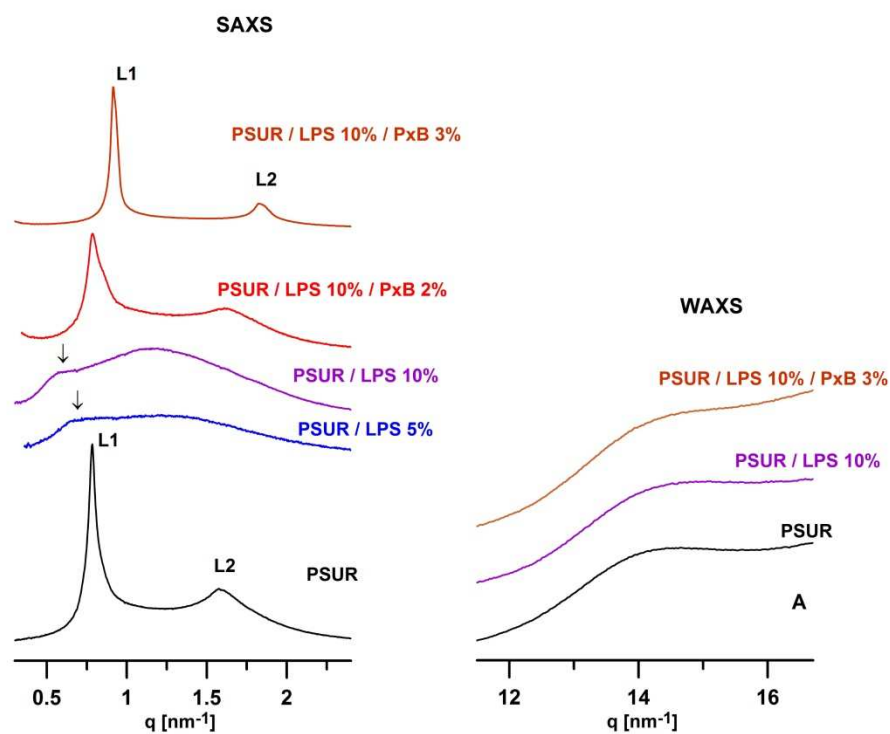

**Figure S5.** SAXS patterns of modified porcine surfactant (PSUR); PSUR and 5 % LPS; PSUR and 10 % LPS incubated for 2 hours; PSUR/10 % LPS and 2 % PxB; PSUR/10 % LPS and 3 % PxB at 37 °C. An arrow indicates the first order peak of a lamellar phase with  $d \sim 12$ -13 nm. WAXS patterns of PSUR, PSUR/10% LPS, PSUR/10 % LPS and 3 % PxB (37°C).

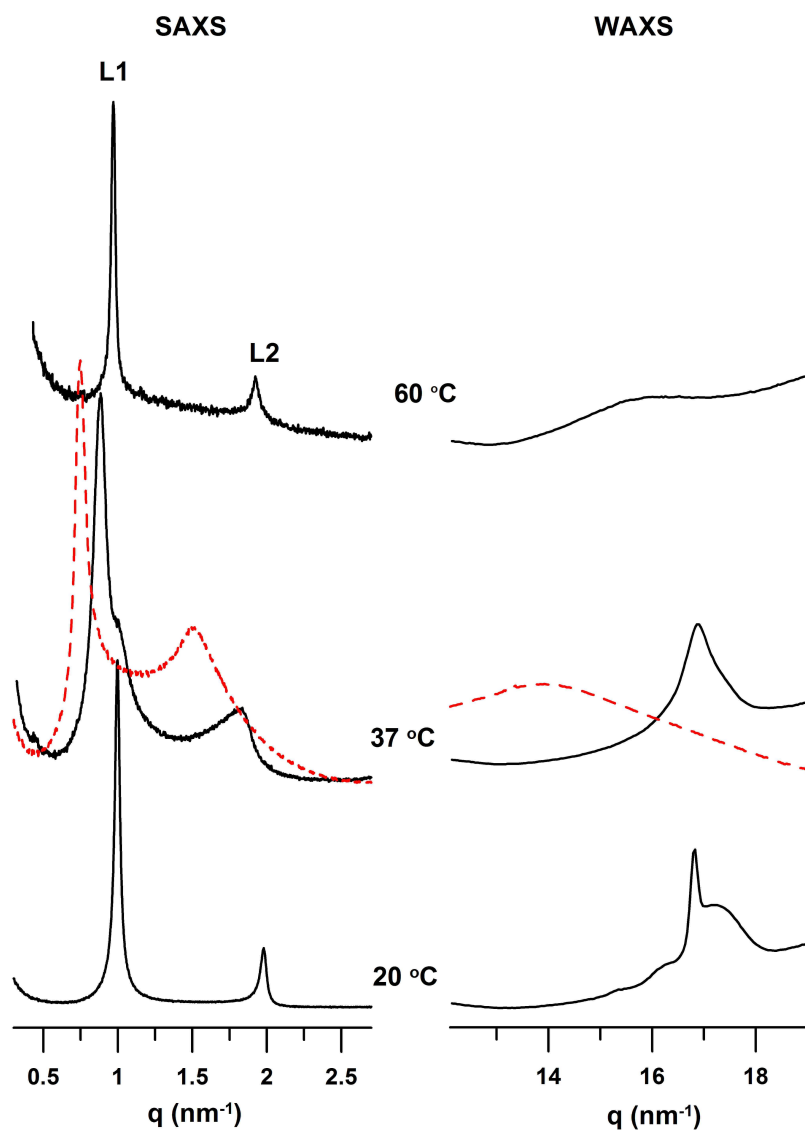

**Figure S6.** SAXS/WAXS patterns of fully hydrated DPPC: tilted gel  $L_{\beta'}$  phase at 20 °C (repeat distance  $d \sim 6.3 \text{ nm}$ ); rippled gel  $P_{\beta}$  phase at 37 °C (repeat distance  $d \sim 7.3 \text{ nm}$ ); liquid-crystalline  $L_{\alpha}$  phase at 60 °C (repeat distance  $d \sim 6.6 \text{ nm}$ ). Dashed red lines represent patterns of PSUR at 37 °C.
